# Supplementary material
Source: PubMed Central journal article supplement (PMC6258958)
Supplement: zjv024184045s1.pdf [file zjv024184045s1.pdf]

1 **LEGENDS FOR SUPPLEMENTARY TABLES**

2

3 **Table S1.** List of the 607 NS1-bound RNAs (genes), summarized from the fragments of  
4 peaks enriched compared to the controls. For each gene, the sum of fold changes, average  
5 fold change, and the number of enriched peaks are listed by the different comparisons  
6 between experimental vs controls. WN1 & WN2 are duplicate experimental (WSN infected  
7 cells and immunoprecipitation performed with anti-NS1 antibody) and duplicate controls:  
8 FN1, FN2 (cells non-infected and immunoprecipitation performed with anti-NS1 antibody),  
9 WG1 and WG2 (WSN infected cells and immunoprecipitation performed with IgG).

10

11 **Table S2.** Transcriptome analysis of A549 cells mock-infected or infected for 6h with WSN at  
12 MOI 5. Comparative ratios and fold changes (FC) are shown of RNAs genome-wide or of  
13 RNAs that are up-regulated and/or are bound by NS1 (marked in yellow).

14

15 **Table S3.** Transcriptome analysis of A549 cells mock-infected or infected for 10 h with WSN  
16 or WSN $\Delta$ NS1 at MOI 5. Comparative ratios and fold changes are shown.

17

18

19
